# Supplementary material for: Efficacy and Safety of Branched Chain Amino Acids on Retinitis Pigmentosa: A Randomized, Double-Blind, Placebo-Controlled Clinical Trial
Source: PubMed Central journal article supplement — Transl Vis Sci Technol. 2024 Aug 16;13(8):29. doi: 10.1167/tvst.13.8.29 (PMC11343008; doi:10.1167/tvst.13.8.29), 2024-08-16
Supplement: tvst-13-8-29_s001.pdf [file tvst-13-8-29_s001.pdf]

**Supplementary Table S1. Study schedule excerpt**

| Period                   | Screening Period | Duration of Investigational Drug Administration |        |         |         |         |         |         |                 |
|--------------------------|------------------|-------------------------------------------------|--------|---------|---------|---------|---------|---------|-----------------|
| Timing of Implementation | Pre-Registration | Start Date of Administration                    | Week 4 | Week 13 | Week 26 | Week 39 | Week 52 | Week 65 | Week 78         |
| Medication Confirmation  |                  |                                                 | ○      | ○       | ○       | ○       | ○       | ○       | ○               |
| ETRS visual acuity test  |                  | ○                                               |        |         |         |         |         |         | ○               |
| HFA 10-2                 | ○ <sup>*1</sup>  |                                                 |        | ○       | ○       | ○       | ○       | ○       | ○ <sup>*1</sup> |
| HFA 30-2                 |                  | ○ <sup>*1</sup>                                 |        |         |         |         |         |         | ○ <sup>*1</sup> |
| OCT                      |                  | ○                                               |        |         |         |         |         |         | ○               |
| Fundus photography       | ○                |                                                 |        |         |         |         |         |         | ○               |

\*1: If reliable data cannot be obtained, a single retest will be conducted within two weeks. Exceeding the allowable limits is acceptable for the retest. However, for the pre-registration Humphrey Visual Field Test (10-2), retesting should also be conducted before registration, whereas for the pre-dosing Humphrey Field Test (30-2), retesting should be conducted before the start of dosing.

ETDRS, Early Treatment Diabetic Retinopathy Study; HFA, Humphrey visual field test 30-2; OCT, Optical coherence tomography.

**Supplementary Table S2. Presumed causative genes**

| Presumed causative gene, n patients (%) | TK-98 (n = 45 patients) | Placebo (n = 25 patients) | Total (n = 70 patients) |
|-----------------------------------------|-------------------------|---------------------------|-------------------------|
| Confirmed cases of causative genes      | 17 (37.8)               | 13 (52.0)                 | 30 (42.9)               |
| <i>EYS</i>                              | 8 (17.8)                | 9 (36.0)                  | 17 (24.3)               |
| <i>RHO</i>                              | 2 (4.4)                 | 0 (0.0)                   | 2 (2.9)                 |
| <i>PDE6B</i>                            | 1 (2.2)                 | 1 (4.0)                   | 2 (2.9)                 |
| <i>RP1L1</i>                            | 2 (4.4)                 | 0 (0.0)                   | 2 (2.9)                 |
| <i>RPGR</i>                             | 1 (2.2)                 | 1 (4.0)                   | 2 (2.9)                 |
| <i>USH2A</i>                            | 1 (2.2)                 | 1 (4.0)                   | 2 (2.9)                 |
| <i>CNGA1</i>                            | 1 (2.2)                 | 0 (0.0)                   | 1 (1.4)                 |
| <i>NR2E3</i>                            | 0 (0.0)                 | 1 (4.0)                   | 1 (1.4)                 |
| <i>PRPH2</i>                            | 1 (2.2)                 | 0 (0.0)                   | 1 (1.4)                 |
| Not determined                          | 3 (6.7)                 | 2 (8.0)                   | 5 (7.1)                 |
| Unclear                                 | 25 (55.6)               | 10 (40.0)                 | 35 (50.0)               |

Presumed causative genes of the full analysis set (FAS). *EYS*, eyes shut homolog; *RHO*, rhodopsin; *PDE6B*, phosphodiesterase 6B; *RP1L1*, RP1 like 1; *RPGR*, retinitis pigmentosa GTPase regulator; *USH2A*, usherin; *CNGA1*, cyclic nucleotide-gated channel subunit alpha 1; *NR2E3*, nuclear receptor subfamily 2 group E member 3; *PRPH2*, peripherin 2.

**Supplementary Table S3. Baseline characteristics of the patients in the PPS population**

| Characteristic                                                        | TK-98 (n = 44 patients) |                        | Placebo (n = 25 patients) |                        | Total (n = 69 patients) |                        | Intergroup comparison |
|-----------------------------------------------------------------------|-------------------------|------------------------|---------------------------|------------------------|-------------------------|------------------------|-----------------------|
|                                                                       | Mean ± SD               | Median (Range)         | Mean ± SD                 | Median (Range)         | Mean ± SD               | Median (Range)         | p                     |
| Sex, n patients (%)                                                   |                         |                        |                           |                        |                         |                        |                       |
| Female                                                                | 23 (52.3)               |                        | 14 (56.0)                 |                        | 37 (53.6)               |                        | 0.806                 |
| Male                                                                  | 21 (47.7)               |                        | 11 (44.0)                 |                        | 32 (46.4)               |                        |                       |
| Age at time of inclusion, y                                           | 51.3 ± 11.6             | 53.0 (21, 77)          | 51.6 ± 14.2               | 50.0 (26, 75)          | 51.4 ± 12.5             | 52.0 (21, 77)          | 0.913                 |
| MD value* at the time of allocation (average for binocular cases), dB | -14.70 ± 4.88           | -14.36 (-23.14, -5.12) | -14.67 ± 5.12             | -13.08 (-23.96, -5.91) | -14.69 ± 4.93           | -13.98 (-23.96, -5.12) | 0.981                 |
| Unilateral and binocular cases                                        |                         |                        |                           |                        |                         |                        | 0.054                 |
| Unilateral                                                            | 1 (2.3)                 |                        | 4 (16.0)                  |                        | 5 (7.2)                 |                        |                       |
| Binocular                                                             | 43 (97.7)               |                        | 21 (84.0)                 |                        | 64 (92.8)               |                        |                       |
| Genetic form, n patients (%)                                          |                         |                        |                           |                        |                         |                        | 0.434                 |
| Autosomal dominant                                                    | 10 (22.7)               |                        | 2 (8.0)                   |                        | 12 (17.4)               |                        |                       |
| Autosomal recessive                                                   | 17 (38.6)               |                        | 12 (48.0)                 |                        | 29 (42.0)               |                        |                       |
| X-linked                                                              | 1 (2.3)                 |                        | 1 (4.0)                   |                        | 2 (2.9)                 |                        |                       |
| Sporadic                                                              | 16 (36.4)               |                        | 10 (40.0)                 |                        | 26 (37.7)               |                        |                       |
| Presumed causative gene, n patients (%)                               |                         |                        |                           |                        |                         |                        |                       |
| Confirmed cases of causative genes                                    | 16 (36.4)               |                        | 13 (52.0)                 |                        | 29 (42.0)               |                        | 0.218                 |
| <i>EYS</i>                                                            | 8 (18.2)                |                        | 9 (36.0)                  |                        | 17 (24.6)               |                        | 0.146                 |
| Time from onset of first subjective symptoms†, y                      | 28.6 ± 13.2             | 29.5 (3, 59)           | 27.0 ± 12.3               | 25.0 (9, 67)           | 28.0 ± 12.8             | 28.0 (3, 67)           | 0.618                 |

Baseline characteristics of the patients in the per protocol set (PPS). \*Calculated using mean deviation (MD) values observed up to 3 years prior to the time of observation at the start of the study (including the time of observation at the start of the pretreatment period). †Time since onset of any of the following symptoms: night blindness, narrowing of the field of vision, loss of vision, or photophobia. dB, decibel; *EYS*, eyes shut homolog; SD, standard deviation.

**Supplementary Table S4. Baseline characteristics of the eyes in the PPS population**

| Characteristic                          | TK-98 (n = 87 eyes) |                      | Placebo (n = 46 eyes) |                      | Total (n = 133 eyes) |                      | Intergroup comparison |
|-----------------------------------------|---------------------|----------------------|-----------------------|----------------------|----------------------|----------------------|-----------------------|
|                                         | Mean ± SD           | Median (Range)       | Mean ± SD             | Median (Range)       | Mean ± SD            | Median (Range)       | p                     |
| Lens, n eyes (%)                        |                     |                      |                       |                      |                      |                      | 0.004                 |
| Phakia                                  | 75 (86.2)           |                      | 29 (63.0)             |                      | 104 (78.2)           |                      |                       |
| Pseudophakia                            | 12 (13.8)           |                      | 17 (37.0)             |                      | 29 (21.8)            |                      |                       |
| Humphrey visual field test 10-2         |                     |                      |                       |                      |                      |                      |                       |
| TPS, dB                                 | 1229.2 ± 329.6      | 1212.0 (615, 1901)   | 1245.3 ± 363.7        | 1284.0 (586, 1836)   | 1238.6 ± 339.5       | 1222.0 (586, 1901)   | 0.659                 |
| MD value, dB                            | -14.8 ± 4.9         | -14.5 (-23.7, -5.0)  | -14.4 ± 5.2           | -13.9 (-24.0, -5.6)  | -14.6 ± 5.0          | -14.2 (-24.0, -5.0)  | 0.549                 |
| MD slope*, dB/y                         | -0.11 ± 0.92        | -0.27 (-1.98, 3.44)  | -0.52 ± 1.05          | -0.45 (-4.27, 1.21)  | -0.21 ± 0.92         | -0.37 (-3.46, 3.44)  | 0.071                 |
| Humphrey visual field test 30-2         |                     |                      |                       |                      |                      |                      |                       |
| TPS, dB                                 | 482.4 ± 350.7       | 358.0 (80, 1628)     | 458.2 ± 306.8         | 343.0 (101, 1223)    | 478.1 ± 336.3        | 361.5 (80, 1628)     | 0.838                 |
| Ellipsoid zone length, μm               | 1557.4 ± 1362.3     | 1460.5 (0.0, 5042.5) | 2028.0 ± 1308.2       | 1913.5 (0.0, 5861.0) | 1720.2 ± 1357.6      | 1649.5 (0.0, 5861.0) | 0.057                 |
| Visual acuity (ETDRS)                   |                     |                      |                       |                      |                      |                      |                       |
| Readable letter count                   | 65.7 ± 17.0         | 71.0 (17, 86)        | 69.1 ± 15.1           | 73.0 (9, 87)         | 67.3 ± 15.7          | 72.0 (17, 87)        | 0.120                 |
| LogMAR                                  | 0.34 ± 0.30         | 0.26 (-0.12, 1.18)   | 0.28 ± 0.27           | 0.22 (-0.06, 1.38)   | 0.32 ± 0.28          | 0.24 (-0.12, 1.18)   | 0.114                 |
| Preserved retinal area, mm <sup>2</sup> | 18.7 ± 15.0         | 14.8 (1.6, 58.1)     | 17.8 ± 12.6           | 14.5 (2.3, 41.9)     | 18.4 ± 14.1          | 14.6 (1.6, 58.1)     | 0.739                 |

Baseline characteristics of the eyes in the per protocol set (PPS). \*Calculated using mean deviation (MD) values observed up to 3 years prior to the time of observation at the start of the study (including the time of observation at the start of the pretreatment period). dB, decibel; TPS, total point score; ETDRS, Early Treatment Diabetic Retinopathy Study; logMAR, logarithm of the minimum angle of resolution; SD, standard deviation.

**Supplementary Table S5. Number of valid Humphrey visual field tests (10-2)**

| Number of valid tests | TK-98 (n = 88 eyes) | Placebo (n = 46 eyes) |
|-----------------------|---------------------|-----------------------|
|                       | n (%)               | n (%)                 |
| 7                     | 69 (78.4)           | 37 (80.4)             |
| 6                     | 11 (12.5)           | 7 (15.2)              |
| 5                     | 4 (4.5)             | 2 (4.3)               |
| 4                     | 3 (3.4)             | 0 (0.0)               |
| 3                     | 1 (1.1)             | 0 (0.0)               |
| 2                     | 0 (0.0)             | 0 (0.0)               |
| 1                     | 0 (0.0)             | 0 (0.0)               |
| 0                     | 0 (0.0)             | 0 (0.0)               |

The number of times a valid test result was obtained out of 7 visual field tests (10-2) set in the trial.

**Supplementary Table S6. Secondary outcome measurements in the PPS population**

|                                         |      | TK-98 |           |                |                         |               | Placebo |           |                |                         |                                           | Intergroup comparison |       |
|-----------------------------------------|------|-------|-----------|----------------|-------------------------|---------------|---------|-----------|----------------|-------------------------|-------------------------------------------|-----------------------|-------|
|                                         | Case | Eye   | Mean ± SD | Median (Range) | Least-squares mean ± SE | Case          | Eye     | Mean ± SD | Median (Range) | Least-squares mean ± SE | Difference in Least-squares mean (95% CI) | p                     |       |
| Humphrey visual field test 10-2         |      |       |           |                |                         |               |         |           |                |                         |                                           |                       |       |
| TPS, dB                                 | CA   | 44    | 87        | -47.9 ± 59.4   | -39.7 (-183.6, 117.5)   | -47.5 ± 8.3   | 25      | 44        | -35.4 ± 63.4   | -37.1 (-192.7, 113.4)   | -37.8 ± 11.3                              | -9.8 (-37.7, 18.2)    | 0.488 |
|                                         | CR   | 44    | 87        | -4.2 ± 5.4     | -4.0 (-19.0, 9.9)       | -4.2 ± 0.8    | 25      | 44        | -3.6 ± 6.6     | -2.9 (-29.8, 7.3)       | -3.7 ± 1.1                                | -0.5 (-3.2, 2.1)      | 0.686 |
| MD value, dB                            | CA   | 44    | 87        | -0.67 ± 0.91   | -0.60 (-2.93, 1.90)     | -0.66 ± 0.13  | 25      | 44        | -0.52 ± 0.99   | -0.57 (-3.18, 1.72)     | -0.57 ± 0.17                              | -0.09 (-0.52, 0.34)   | 0.675 |
|                                         | CR   | 44    | 87        | -5.2 ± 7.6     | -4.2 (-26.3, 13.0)      | -5.1 ± 1.2    | 25      | 44        | -3.8 ± 9.6     | -4.4 (-28.1, 27.7)      | -4.1 ± 1.6                                | -1.0 (-4.9, 2.9)      | 0.621 |
| Humphrey visual field test 30-2         |      |       |           |                |                         |               |         |           |                |                         |                                           |                       |       |
| TPS, dB                                 | CA   | 44    | 85        | -37.8 ± 57.6   | -21.7 (-241.9, 47.4)    | -38.0 ± 7.5   | 25      | 43        | -21.9 ± 57.9   | -19.7 (-237.9, 145.6)   | -20.1 ± 10.3                              | -17.8 (-43.1, 7.5)    | 0.165 |
|                                         | CR   | 44    | 85        | -6.4 ± 10.8    | -5.4 (-30.9, 29.5)      | -6.3 ± 1.4    | 25      | 43        | -6.4 ± 12.9    | -5.4 (-40.3, 20.6)      | -6.1 ± 2.0                                | -0.2 (-5.0, 4.6)      | 0.934 |
| Visual acuity (ETDRS)                   |      |       |           |                |                         |               |         |           |                |                         |                                           |                       |       |
| Readable letter count                   | CA   | 44    | 87        | -1.1 ± 2.9     | -0.7 (-13.9, 4.0)       | -1.1 ± 0.3    | 25      | 44        | -0.7 ± 2.8     | -0.7 (-8.5, 6.6)        | -0.8 ± 0.5                                | -0.3 (-1.4, 0.8)      | 0.631 |
|                                         | CR   | 44    | 87        | -2.3 ± 7.3     | -1.3 (-38.5, 15.5)      | -2.2 ± 0.8    | 25      | 44        | -0.8 ± 4.6     | -0.9 (-12.2, 12.7)      | -1.0 ± 1.0                                | -1.3 (-3.9, 1.3)      | 0.322 |
| LogMAR                                  | CA   | 44    | 87        | 0.026 ± 0.072  | 0.013 (-0.079, 0.396)   | 0.026 ± 0.008 | 25      | 44        | 0.019 ± 0.062  | 0.013 (-0.132, 0.198)   | 0.020 ± 0.011                             | 0.006 (-0.022, 0.033) | 0.679 |
|                                         | CR   | 44    | 87        | 16.6 ± 57.1    | 4.0 (-39.6, 330.2)      | 12.0 ± 4.3    | 25      | 44        | 20.1 ± 56.5    | 8.3 (-31.5, 337.6)      | 17.1 ± 6.0                                | -5.2 (-19.8, 9.5)     | 0.485 |
| Ellipsoid zone length, μm               | CA   | 44    | 87        | -77.1 ± 66.5   | -72.0 (-371.2, 0.0)     | -77.5 ± 9.0   | 25      | 46        | -95.6 ± 78.3   | -80.4 (-344.1, 0.0)     | -95.5 ± 12.2                              | 17.9 (-12.4, 48.2)    | 0.241 |
|                                         | CR   | 41    | 74        | -8.7 ± 9.2     | -4.8 (-46.4, -0.6)      | -9.4 ± 1.3    | 25      | 44        | -6.9 ± 7.7     | -4.0 (-33.2, -0.1)      | -7.4 ± 1.7                                | -2.0 (-6.2, 2.3)      | 0.362 |
| Preserved retinal area, mm <sup>2</sup> | CA   | 44    | 84        | -0.92 ± 0.88   | -0.64 (-3.57, -0.01)    | -0.93 ± 0.14  | 25      | 46        | -0.96 ± 1.19   | -0.36 (-5.29, -0.01)    | -0.97 ± 0.18                              | 0.05 (-0.41, 0.51)    | 0.843 |
|                                         | CR   | 44    | 84        | -5.5 ± 4.4     | -4.1 (-22.0, -0.1)      | -5.5 ± 0.5    | 25      | 46        | -4.9 ± 3.7     | -3.7 (-13.8, -0.3)      | -4.9 ± 0.7                                | -0.6 (-2.4, 1.1)      | 0.483 |

Main second outcome measurements in the per protocol set (PPS) population. All changes (amount of change, CA) were changes per year. The change rate (CR) is the amount of change divided by the absolute value of the initial measurement and multiplied by 100. The least squares mean is the mean of each group estimated in a mixed-effects model that accounts for binocular correlation. Because cataract progression was observed in two eyes in the placebo group, these eyes were excluded from the analysis of the visual field and visual acuity tests in the PPS population. TPS, total point score; dB, decibel; MD, mean deviation; ETDRS, Early Treatment Diabetic Retinopathy Study; logMAR, logarithm of the minimum angle of resolution; SD, standard deviation; SE, standard error; CI, confidence interval. The p-values represent the results of a two-tailed test of the null hypothesis "the difference between the least squares means of the two groups is zero" at a significance level of  $\alpha = 0.05$ .

**Supplementary Table S7. Adverse events in the eyes**

| Event                            | TK-98 (n = 45 patients) | Placebo (n = 25 patients) | Difference<br>(95% CI) | p     |
|----------------------------------|-------------------------|---------------------------|------------------------|-------|
|                                  | n (%)                   | n (%)                     |                        |       |
| Blepharitis                      | 1 (2.2)                 | 0 (0.0)                   | 2.2 (-22.3, 26.5)      | 1.000 |
| Cataract                         | 0 (0.0)                 | 3 (12.0)                  | -12.0 (-35.7, 12.5)    | 0.042 |
| Chalazion                        | 1 (2.2)                 | 0 (0.0)                   | 2.2 (-22.3, 26.5)      | 1.000 |
| Conjunctivitis                   | 1 (2.2)                 | 1 (4.0)                   | -1.8 (-26.1, 22.6)     | 1.000 |
| Allergic conjunctivitis          | 1 (2.2)                 | 0 (0.0)                   | 2.2 (-22.3, 26.5)      | 1.000 |
| Superficial Punctate Keratopathy | 1 (2.2)                 | 0 (0.0)                   | 2.2 (-22.3, 26.5)      | 1.000 |
| Foreign body                     | 0 (0.0)                 | 1 (4.0)                   | -4.0 (-28.2, 20.5)     | 0.357 |
| Macular edema                    | 3 (6.7)                 | 0 (0.0)                   | 6.7 (-18.0, 30.7)      | 0.548 |
| Decrease in visual acuity        | 5 (11.1)                | 1 (4.0)                   | 7.1 (-17.5, 31.0)      | 0.410 |
| Worsening of visual field        | 39 (86.7)               | 21 (84.0)                 | 2.7 (-21.8, 26.9)      | 0.737 |
| Epiretinal membrane              | 2 (4.4)                 | 0 (0.0)                   | 4.4 (-20.1, 28.6)      | 0.534 |
| Total                            | 39 (86.7)               | 22 (88.0)                 |                        |       |

Adverse events corresponding to eye damage, regardless of severity, in the safety analysis set (SAF) population. "Decrease in visual acuity" was defined as worsening of 0.3 logarithm of the minimum angle of resolution (logMAR) or greater compared to the beginning of the study. "Worsening of visual field" addressed negative mean deviation slopes on the Humphrey 10-2 tests during the study period. The p-value was based on the Fisher's exact test. CI, confidence interval.
